# Supplementary material for: A terbium(iii) lanthanide–organic framework as a selective and sensitive iodide/bromide sensor in aqueous medium
Source: Royal Society of Chemistry journal article supplement (doi:10.1039/d0dt03879b), 2020-12-28
Supplement: d0dt03879b1.pdf [file d0dt03879b1.pdf]

## Supplementary information

### **A terbium(III) lanthanide-organic framework as selective and sensitive iodide/bromide sensor in aqueous medium**

Lan-jun Liu,<sup>a, b, #</sup> Meng-yao Zhang,<sup>a, #</sup> Qing-zhong Guo,<sup>a</sup> Zhan-hui Zhang<sup>a</sup> and Jun-fang Guo<sup>\*a</sup>

<sup>a</sup>. School of Materials Science and Engineering, Wuhan Institute of Technology, Wuhan 430205, China. E-mail Address: [junfangguo@aliyun.com](mailto:junfangguo@aliyun.com) (J.-F. Guo).

<sup>b</sup>. School of Civil Engineering and Architecture, Wuhan Institute of Technology, Wuhan 430205, China.

<sup>#</sup>. These authors contributed equally to this work.

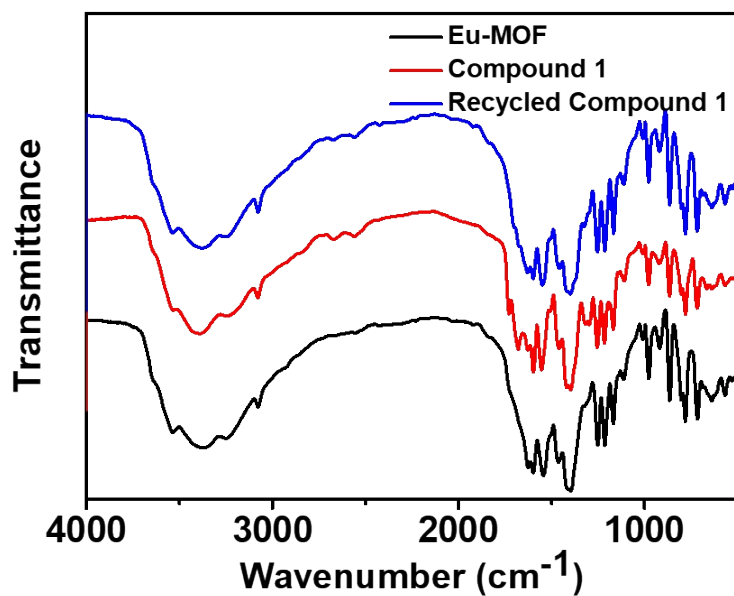

Fig. S1 FTIR spectra of compound 1 (red line), recycled compound 1 (blue line) and Eu-MOF (black line).

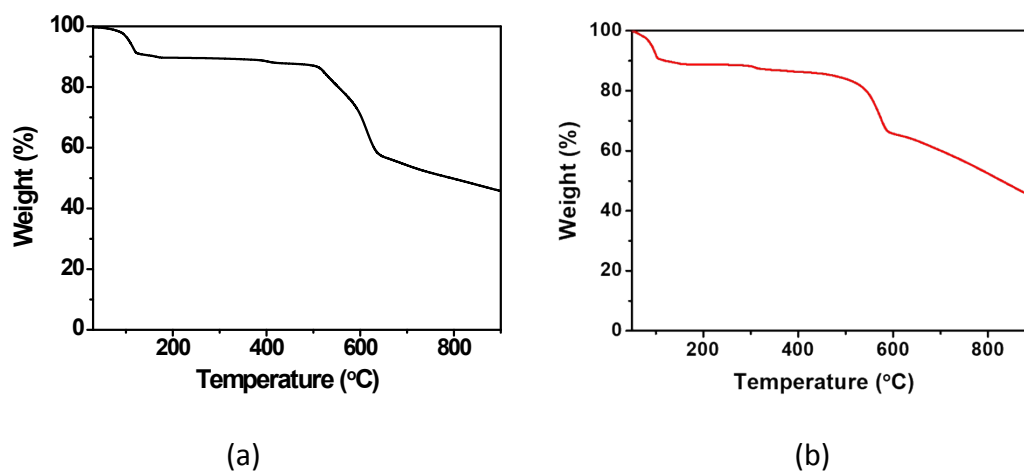

Fig. S2 The TGA curves for compounds 1 (a), Eu-MOF (b) heated from room temperature to 900  $^{\circ}\text{C}$  under  $\text{N}_2$  atmosphere at the heating rate of  $5^{\circ}\text{C}\cdot\text{min}^{-1}$ .

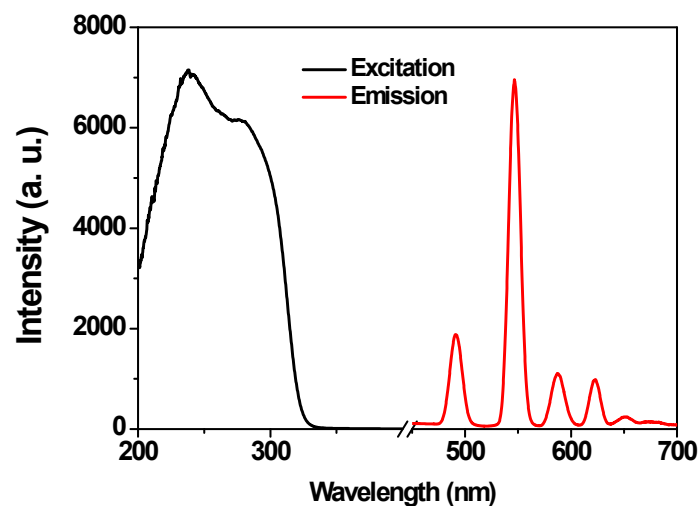

Fig. S3 Excitation spectrum ( $\lambda_{em}=547$  nm) and emission spectrum ( $\lambda_{ex}=239$  nm) of compound **1**.

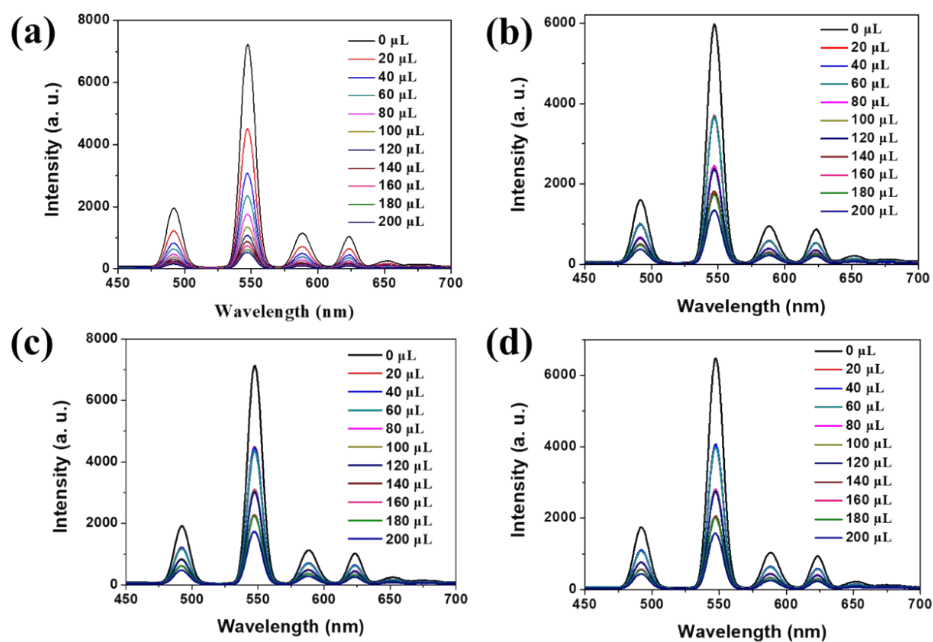

Fig. S4 Photoluminescence spectra of compound **1** upon progressive addition of the  $I^-$  aqueous solution (0.01 M, 20  $\mu$ L addition each time) (a); Tracked Emission spectra of compound **1** upon the addition of  $I^-$  anions in the presence and absence of  $Br^-$  (b);  $CO_3^{2-}$  (c);  $PO_4^{3-}$  (d).

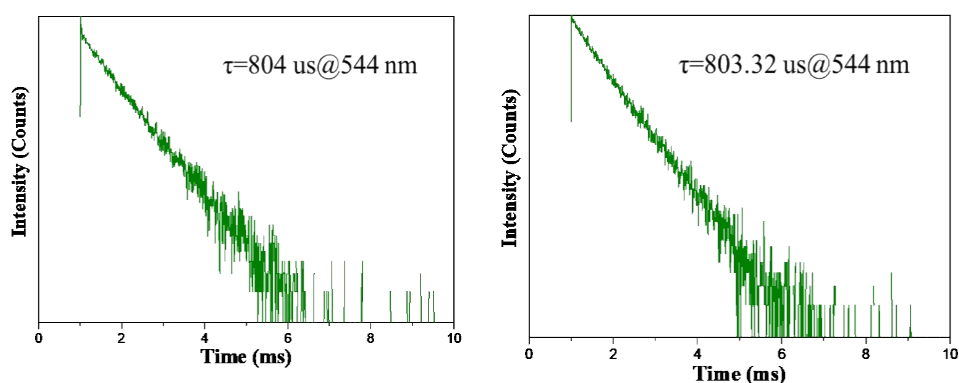

Fig.S5 Decay curves for  $\text{Tb}^{3+} \ ^5\text{D}_4 \rightarrow \ ^7\text{F}_5$  emission in aqueous dispersion of compound **1** before(left) and after(right) the addition of  $\text{I}^-$ .

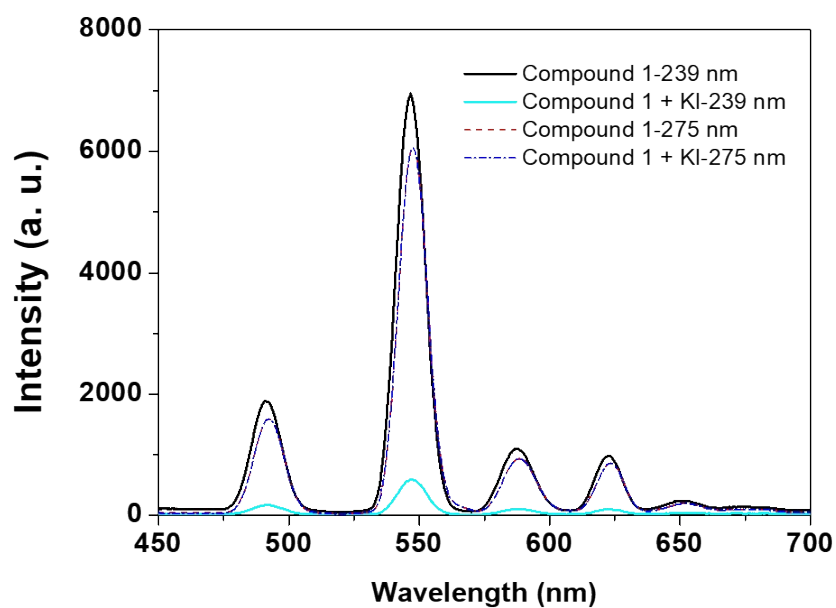

Fig.S6 Photoluminescence spectra of compound **1** in the presence or absence of  $\text{I}^-$  (Conc.=1 mM) in water excited upon 239 or 275 nm.

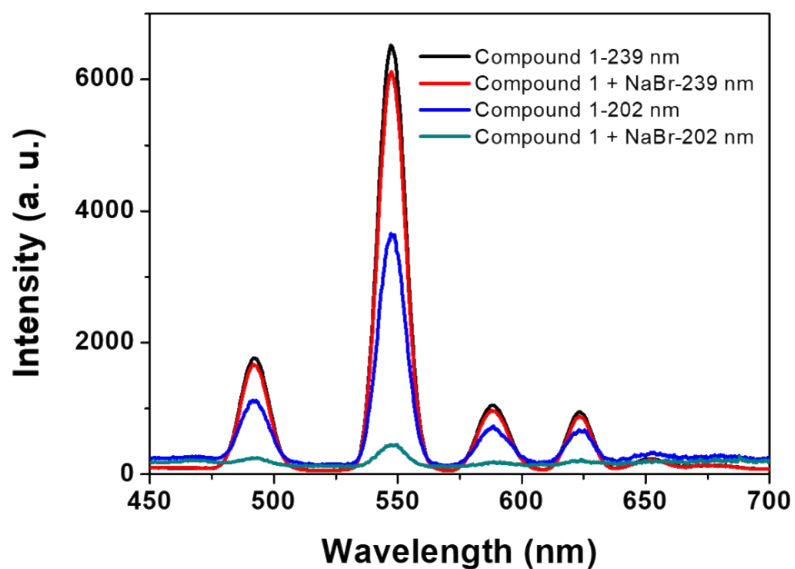

Fig.S7 Photoluminescence spectra of compound **1** in the presence or absence of Br<sup>-</sup> (Conc.=1 mM) in water excited upon 239 or 202 nm.

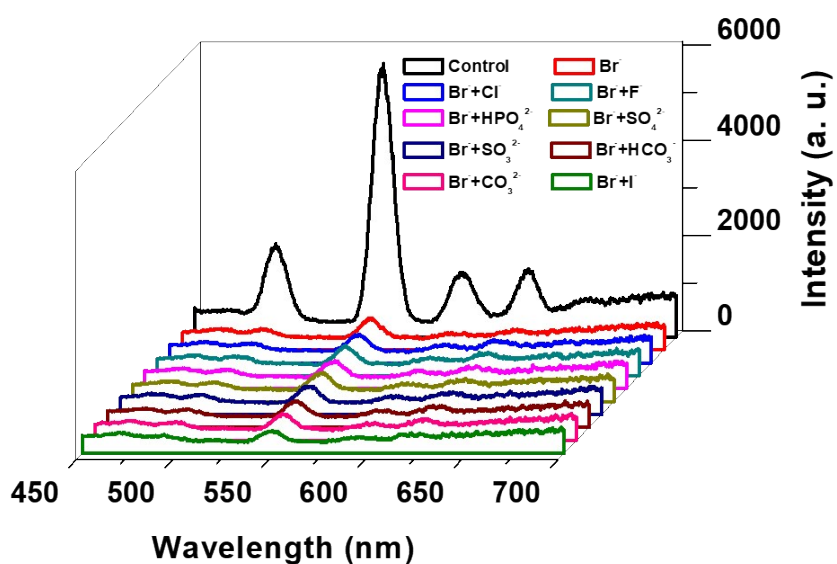

Fig. S8 Fluorescence intensity of **1** in water in the presence of bromide and with addition of 1 mM different anions excited upon 202 nm.

Table 1. Comparison of the Iodide Detection Efficiency of **1** with Other Sensors

|    | I- sensors                            | Methods               | K <sub>sv</sub> (M <sup>-1</sup> ) | LOD (μM) | Refs      |
|----|---------------------------------------|-----------------------|------------------------------------|----------|-----------|
| 1  | IPF                                   | fluorescence turn off | 4310                               | 0.80     | 1         |
| 2  | Cz-TPM                                | fluorescence turn off | 2372                               | 7.9      | 2         |
| 3  | benzimidazole-based tripodal receptor | fluorescence turn off | (1.5 ± 0.2) × 10 <sup>3</sup>      | 7.45     | 3         |
| 4  | imidazolium-based cyclophane          | colorimetric          | Not given                          | 10       | 4         |
| 5  | quinoxaline-based azine derivatives   | colorimetric          | Not given                          | 4.77     | 5         |
| 6  | D–A type Zn(II) complexes             | fluorescence turn off | Not given                          | 0.58     | 6         |
| 7  | NC-PNPs-Hg(II) nanocomplex            | fluorescence turn off | Not given                          | 0.9      | 7         |
| 8  | Cu(I)-MOF                             | colorimetric          | Not given                          |          | 8         |
| 9  | Tb/Zn Hetero-MOF                      | fluorescence turn off | 1.8×10 <sup>5</sup>                | 0.01     | 9         |
| 10 | Cd-MOF                                | fluorescence turn off | 1.8×10 <sup>4</sup>                | 0.63     | 10        |
| 11 | <b>1</b>                              | fluorescence turn off | 1.23×10 <sup>4</sup>               | 2.29     | This work |

- [1] Z. Chen, R. Sun, S. Feng, D. Wang and H. Liu, *ACS Appl. Mater. Interfaces*, 2020, **12**, 11104–11114.
- [2] Q. Q. Dang, H. J. Wan, and X. M. Zhang, *ACS Appl. Mater. Interfaces*, 2017, **9**, 21438–21446.
- [3] D. Y. Lee, S. Narinder, J. K. Min and O. J. Doo, *Org. Lett.*, 2011, **13**, 3024–3027.
- [4] V. Suresh, N. Ahmed, I. S. Youn and K. S. Kim, *Chem-Asian J.*, 2012, **7**, 658–663.
- [5] B. Gopal and S. Velmathi, *Sens. Actuators, B*, 2018, **256**, 126–134.
- [6] H. Su, L. Hao, W. Hussain, Z. Li and H. Li, *CrystEngComm*, 2020, **22**, 2103–2109.
- [7] Y. Fan, L. Han, S. Liu, Y. Zhang, H. Luo and N. Li, *J. Mater. Chem. C*, DOI: 10.1039/d0tc01983f.
- [8] Y. Q. Chen, G. R. Li, Z. Chang, Y. K. Qu, Y. H. Zhang and X. H. Bu, *Chem. Sci.*, 2013, **4**, 3678–3682.
- [9] P. F. Shi, H. C. Hu, Z. Y. Zhang, G. Xiong and B. Zhao, *Chem. Commun.*, 2015, **51**, 3985–3988.
- [10] D. K. Singha, P. Majee, S. K. Mondal and P. Mahata, *J. Photochem. Photobiol. A: Chem.*, 2018, **356**, 389–396.
